# Supplementary material for: A gene expression atlas of a bicoid-depleted Drosophila embryo reveals early canalization of cell fate
Source: PubMed Central journal article supplement (PMC4302997; doi:10.1242/dev.117796), 2015-02-01
Supplement: supp_142.3.587_DEV117796supp.pdf [file supp_142.3.587_DEV117796supp.pdf]

**Supplementary Figure Legends**

Fig. S1: The phenotype spectrum of *bcd* RNAi cuticles resembles an allelic series

- A. Unhatched cuticles of embryos laid by *MTD-Gal4/UAS-shRNA-bcd* females display variable numbers of denticle bands. A representative individual from each class is shown. The filzkörper, a tail structure, is indicated with arrow heads. Cuticles with weak *bcd* phenotypes have 9 or more bands and some thoracic segments, but no head structures. Cuticles with strong *bcd* phenotypes have only abdominal segments and a duplicated filzkörper. Scale bar 200 microns.
- B. An additional *UAS-shRNA-bcd* (GL01320) line gives a similar phenotype.
- C. The maternal driver *mat-tub-Gal4* gives a similar phenotype with both *UAS-shRNA-bcd* lines.

To test viability, we arrayed 200 embryos on an agar plate and counted the number hatched after 48 hrs at 25°C. For *bcd* RNAi embryos, 0/200 and 0/200 embryos hatched; for embryos laid by *MTD-Gal4/UAS-shRNA-GFP* females 222/239 and 178/200 of embryos hatched (TRiP Toolbox stock 182) (Neumuller et al., 2012).

Fig. S2: Mother age contributes strongly to the strength and variability of the *bcd* RNAi phenotype while temperature, *UAS-shRNA-bcd* line, maternal driver, zygotic *UAS-shRNA-bcd* construct copy number, and paternal genotype do not.

- A. The severity of *bcd* phenotype increases as the flies age. We allowed *MTD-Gal4/UAS-shRNA-bcd* flies to eclose for 48 hrs and counted denticle bands every few days. Old mothers were  $\geq 11$  days old and embryos were collected for the gene expression atlas. Counts: Day 2 n = 137, Day 6 n = 173, Day 8 n = 224, Day 11 n = 86, Day 14 n = 127, Day 16 n = 58.
- B. qPCR indicates  $>75\%$  knockdown in embryos laid by older mothers. Embryos were collected for 2 hrs. As a reference for WT *bcd* levels we used embryos from Day 7 *MTD-Gal4/UAS-shRNA-GFP* embryos. Samples have three replicates (two replicates for Day 10) and error bars are SEM.
- C. Paternal genotype does not meaningfully influence the *bcd* RNAi phenotype. *MTD-Gal4/UAS-shRNA-bcd* virgin females were crossed to males homozygous for *UAS-shRNA-bcd* or with males homozygous for an enhancer lacZ reporter (WT). Progeny from the first cross will have 1-2 copies of the *UAS-shRNA-bcd* construct (blue), while progeny from the second cross will have 0-1 copies of the *UAS-shRNA-bcd* construct (red). We could not detect a difference between the number of ventral denticle bands visible in each population (p values from Kolmogorov-Smirnov test). Note that the effect of mother age is much greater than paternal genotype (compare Day 1 and Day 6 samples). Although it is possible that shRNAs against *bcd* are zygotically expressed, they do not meaningfully contribute to the phenotype, consistent with the purely maternal effect of *bcd*. These crosses also showed there was no detectable paternal effect.
- D. Two *UAS-shRNA-bcd* lines yield similar phenotypes. We tested two shRNA lines (GL00407 and GL01320) at 25°C and 29°C, taking samples on Day 4 and Day 10. For these crosses we used the *mat-tub-Gal4* maternal driver; this driver tends to give a more consistent phenotype than *MTD-Gal4*. Analysis of variance (ANOVA) of temperature, UAS-line, and day reveal that each has a significant but small effect, less than one segment in all cases. For the *mat-tub-Gal4* driver, the distribution of phenotypes laid by young mothers approaches the steady state distribution seen for old mothers with *MTD-*

*Gal4* more quickly. This result is consistent with more uniform phenotypes for the *mat-tub-Gal4* driver with shRNAs against other genes (Staller et al., 2013). The distributions of embryos laid by old mothers of both genotypes are comparable. For future work depleting other maternal effect genes, we recommend the *mat-tub-Gal4* driver.

Fig. S3: *bcd* RNAi embryos have more cells and altered cell density patterns.

- A. Average cell density maps of WT and *bcd* RNAi embryos. While the physical shape of the embryos remains asymmetric, the posterior density pattern is duplicated in the anterior of *bcd* RNAi embryos, like some mRNA patterns. Embryos from stage 5:51-100% (time points 5 and 6 in the gene expression atlases) are shown. Note these images sometimes do not load in Preview and are best viewed in Adobe Acrobat.
- B. Histogram of cell counts in *bcd* RNAi embryos and WT (transgenic) embryos.

Fig. S4: The *bcd* RNAi gene expression atlas perturbs *hb* mRNA and protein levels.

- A. Hb protein expression pattern changes over stage 5 in both WT and *bcd* RNAi. In WT both maternal *hb* mRNA and *bcd* activated zygotic mRNA contribute to the anterior pattern, while in *bcd* RNAi, only maternal mRNA contributes to the early, broad anterior pattern (Tautz, 1988). Note each atlas is normalized separately, so absolute levels are not comparable between atlases. Relative levels change extensively.
- B. In both WT and *bcd* RNAi, *hb* mRNA (gray) and protein (red) patterns are different.

Fig. S5: The boundaries of the *eve* stripes move over stage 5 in *bcd* RNAi embryos.

- A. Boundary positions calculated using inflection points of individual embryos. Stripe 4 and 5 appear in a handful of embryos in cohort 4, but not frequently enough to reliably quantify boundary position. In each plot, anterior is left, dorsal is top.
- B. The widths of the *eve* stripes contract in *bcd* RNAi embryos. At T = 5 *eve* stripes 4-7 are approximately 1.7, .6, 1.4, and 1.3 cell widths wider in *bcd* RNAi than WT. At T = 6 *eve* stripes 4-7 are approximately 1.3, .6, 1.5, and .3 cell widths wider in *bcd* RNAi than WT. Data calculated from one DV strip along the left side of the embryo. Error bars are SEM.

Fig. S6: The coefficient of variation of most of the gap and *eve* stripe mRNA pattern widths are similar between WT (blue) and *bcd* RNAi (red). The exceptions are *Kr* and the anterior *eve* stripe, which are more variable in *bcd* RNAi embryos. The ventral region of the ectopic anterior *hb* pattern (DV strips 7-11) is very faint in *bcd* RNAi embryos, and our analysis script struggles to reliably find a boundary, so this analysis likely overstates the variability in this region. Pattern widths calculated with the inflection point, but using the half maximum led to very similar measurements. The ectopic anterior *hb* pattern in *bcd* RNAi is compared to the *hb* posterior pattern in WT.

Fig. S7: The locations of each transcription factor combination at T=3 in WT (blue) and *bcd* RNAi (red). The “sum” of each category is shown at the bottom.

Fig. S8: Changing the ON/OFF threshold does not meaningfully change the conclusions of the combination analysis.

- A. For a range of thresholds and most time points, all combinations present in *bcd* RNAi also present in WT. See Fig. S9B for schematic of how we vary thresholds.

- B. When a combination was detected as unique to *bcd* RNAi, this was generally because it was not detected in WT for that threshold and time point. At high thresholds, overlap between adjacent patterns (*Kr* and *kni* or *kni* and *gt*) were not detected in WT. At T=4, the adjacent *hb*, *hkb* and *tll* patterns do not overlap enough to be detected in WT at most thresholds, but this combination was found at T=3, so it is not a true new combination. The new combinations found at T=6 arise either because the WT *hkb* data is low quality or because the anterior duplicated *tll* domain is smaller than the posterior domain.
- C. Line traces of *Kr*, *hkb*, and *tll* at T=6 in WT and *bcd* RNAi. Anterior-posterior position is on the x-axis and expression level is on the y-axis. The high levels of background in the WT *hkb* pattern may confound the combination analysis. The duplicated *tll* pattern in the anterior has weaker expression than in the posterior at T=6, which may explain the apparent emergence of the *Kr*, *hkb* combination. See also Fig. S10C.

Fig S9: Substituting Hb protein for *hb* mRNA does not meaningfully change the conclusions of the combination analysis

- A. For a range of thresholds and most time points, all combinations present in *bcd* RNAi are also present in WT.
- B. Compare to Fig. S8B. In practice, the Hb protein (hbP) data is more difficult to partition into ON and OFF cells. Our method for finding ON cells is to make a histogram of the expression data, find the peak of the OFF cells, and add one s.d. For Hb protein, we add 0.5 s.d. instead. Accordingly, in this table the threshold of 0.9 (or 1.1) means we used 0.9 (or 1.1) s.d. for the 5 mRNAs and 0.45 (or 0.55) for Hb protein. When using the Hb protein data, the analysis is more sensitive to changes in threshold. For example, at T=3 for a threshold of 1.2 (0.6 for Hb protein), the posterior Hb protein domain in WT is no longer detected, leading to the false detection of the *hbP*, *tll*, *hkb* combination in *bcd* RNAi.

Fig. S10: Repeating the combination analysis with a coarsely aligned atlas suggests the fine scale alignment using the fiduciary marker does not confound our conclusions.

- A. For a range of thresholds and most time points, all combinations present in *bcd* RNAi also present in WT.
- B. Compare to Fig. S9B. No new combinations arose for T=1-3. As expected, the abundances of many combinations changed subtly. New combinations are in bold. Most occurred with the fine atlas at other times or thresholds. e.g. *Kr*, *tll*, *hkb* in T=5 can be found in WT at T=6.
- C. The mRNA patterns of *hb*, *Kr*, *tll*, and *hkb* at T=6 in WT and *bcd* RNAi. The combinations that were detected as unique to *bcd* RNAi in this time point are at the boundaries of these pattern in the termini. They may reflect subtle changes in the dynamics of terminal expression patterns, but are more likely artifacts of the differences in absolute levels between genotypes (which are not captured because each atlas is normalized separately) or because the T=6 *hkb* data has high background in WT, which causes this analysis to call it as ON in fewer cells.

Fig. S11: Thresholds, stain hapten, and mother age do meaningfully influence the fraction of cells expressing both *eve* and *ftz*.

- A. The hapten (DIG or DNP) of the *eve* mRNA probe does not bias this analysis. *ftz* is always in the other channel.
- B. A schematic shows the effects of varying the ON/OFF threshold for either *eve* or *ftz*. To find the threshold, we create a histogram of the expression level of each gene separately and identify the peak of the OFF cell population (mode). For our normal threshold, we add one standard deviation. We varied the threshold to be 0.6, 0.8, 1 and 1.2 standard deviations.
- C. C-F) Regardless of the ON/OFF threshold used, the fraction of cells expressing both *eve* and *ftz* (double ON cells) decreases over time. The mixed mom *eve* DNP embryos (magenta) were collected from cages that had a wide range of mother ages before we started collecting from aged cages. We included these data because they have a very high quality stain. These data indicate that mother age does not have a meaningful effect on this analysis. In Fig. 6 the red and magenta data are combined. In all plots, error bars are the s.e.m.

## Supplementary Figures

Figure S1

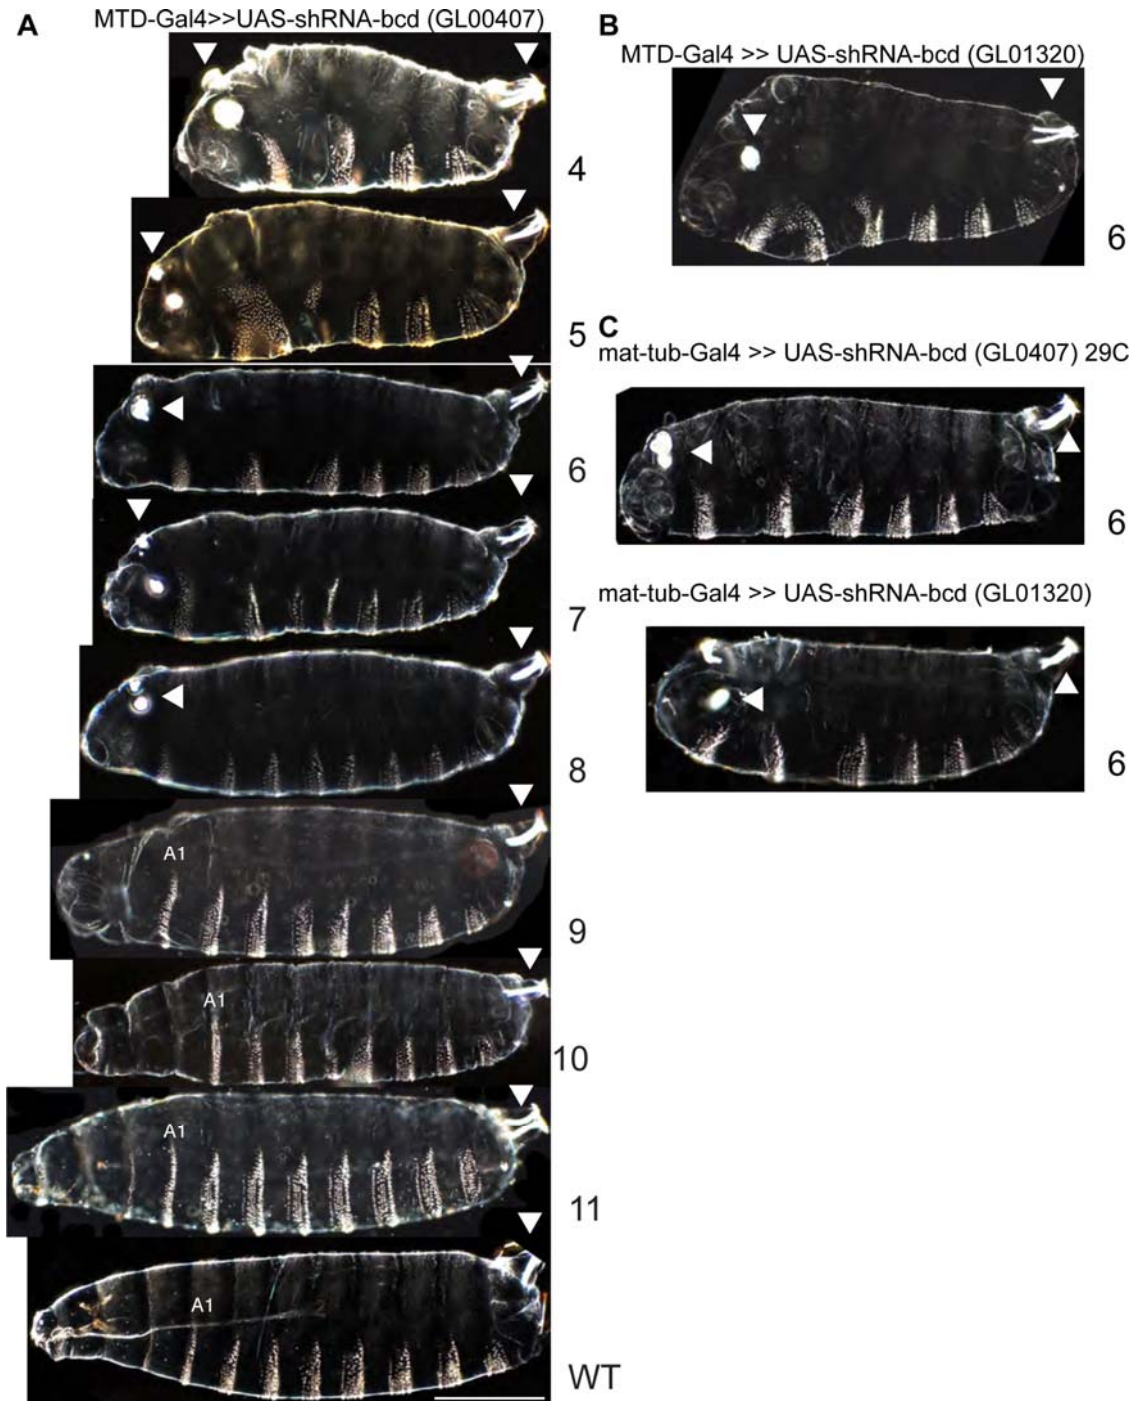

Figure S2

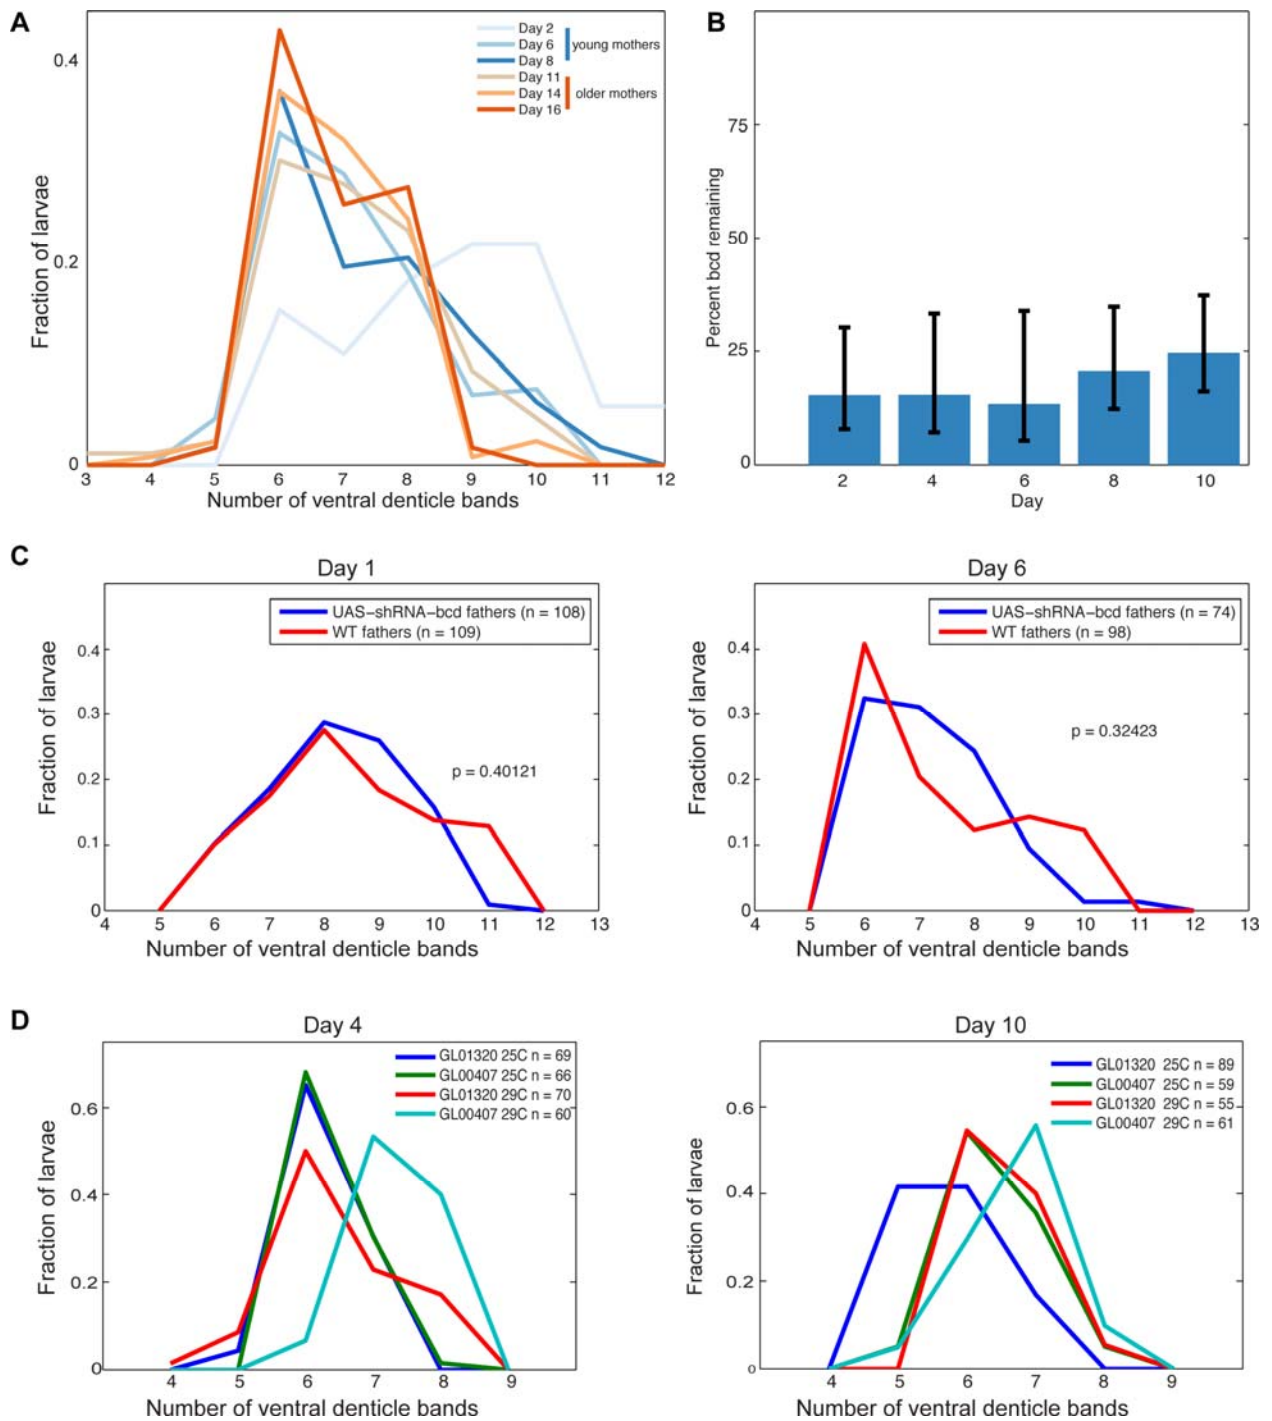

**Figure S3**

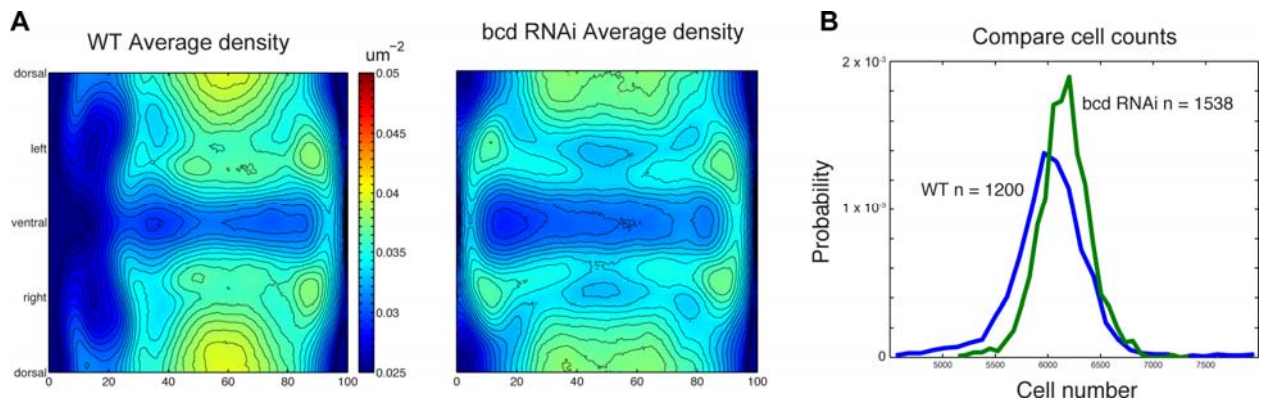

**Figure S4**

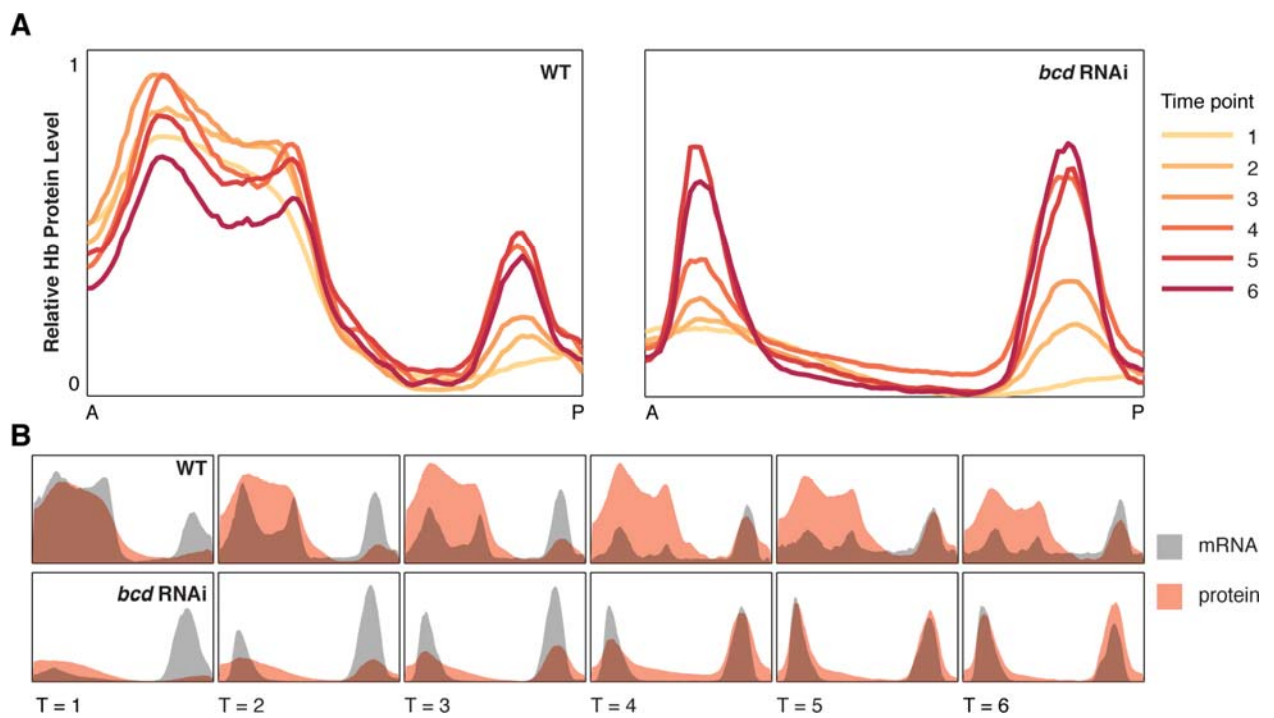

Figure S5

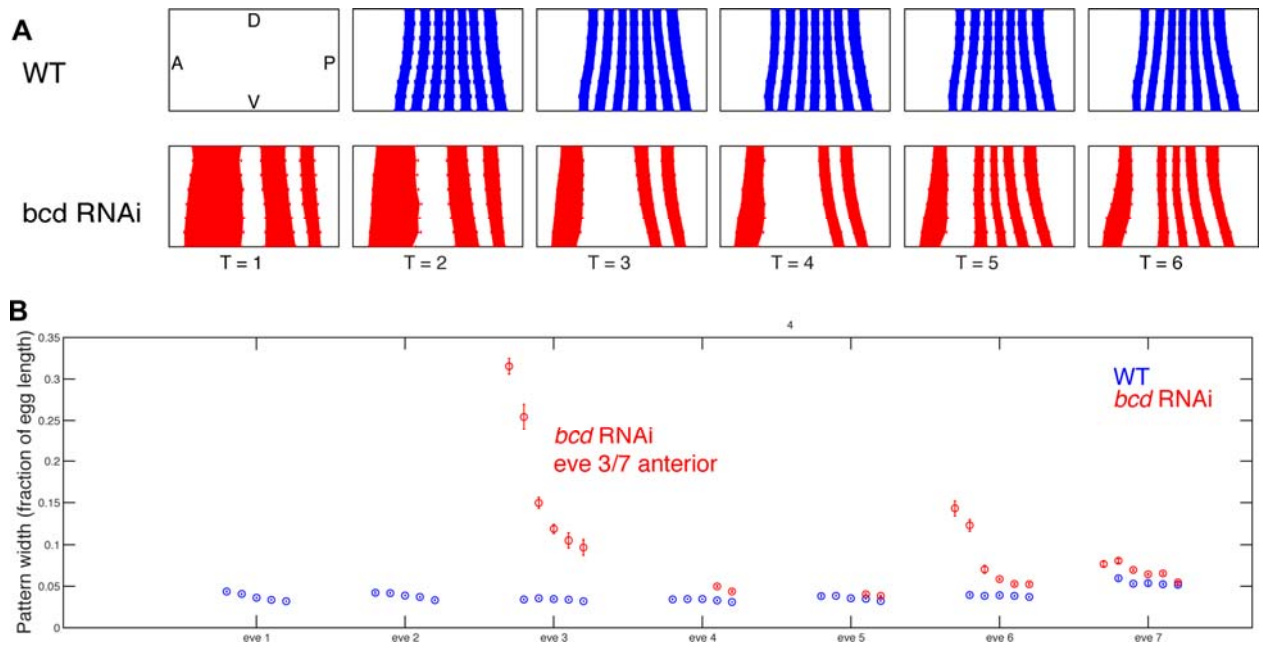



Figure S6

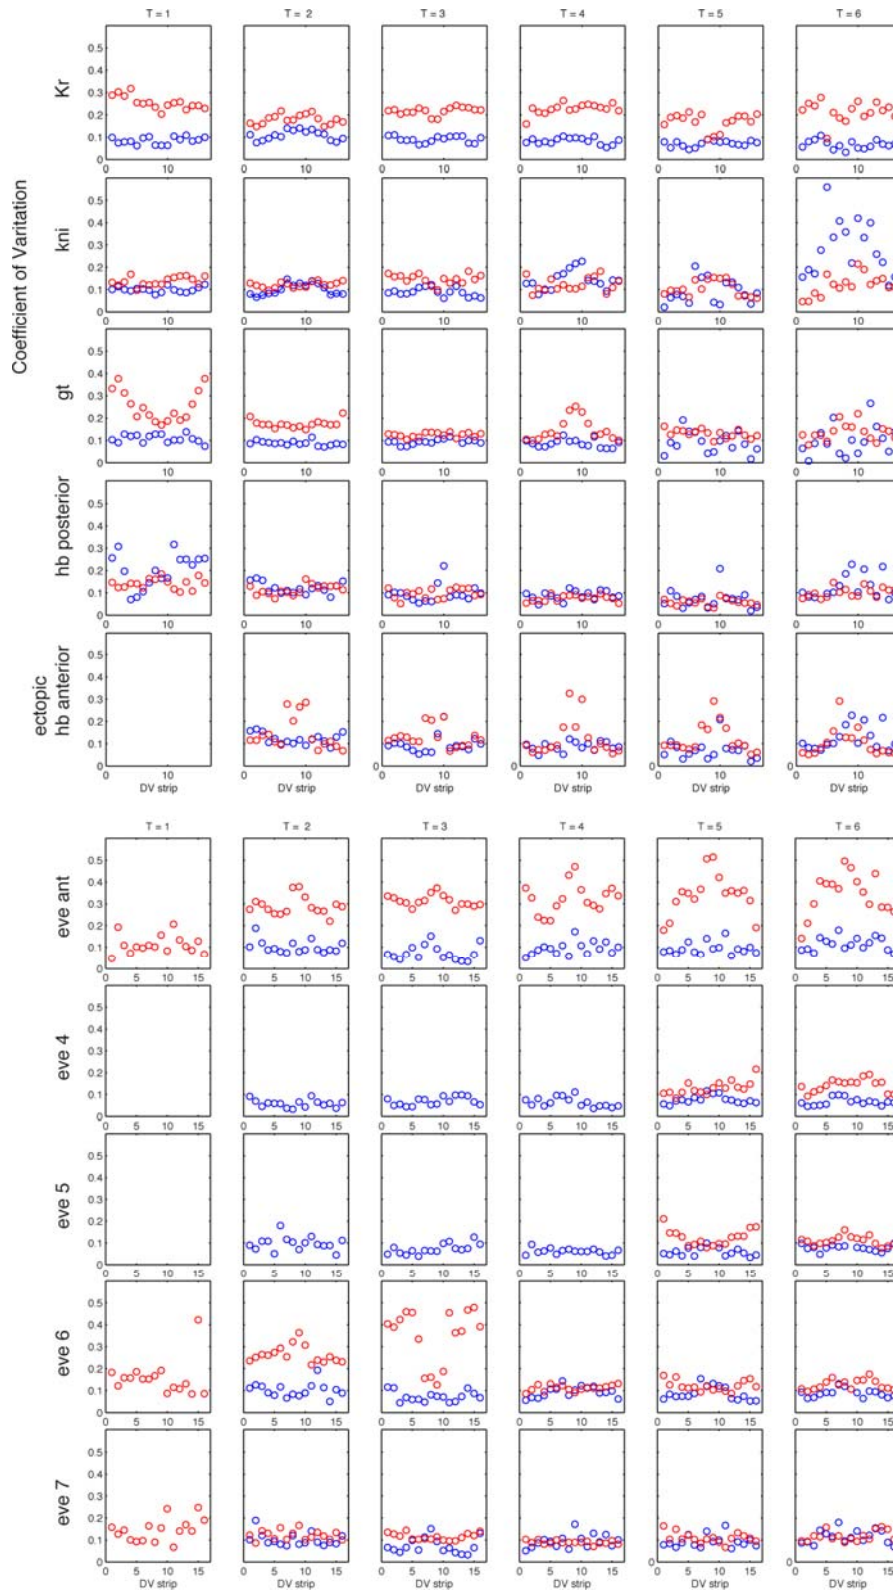

**Figure S7**

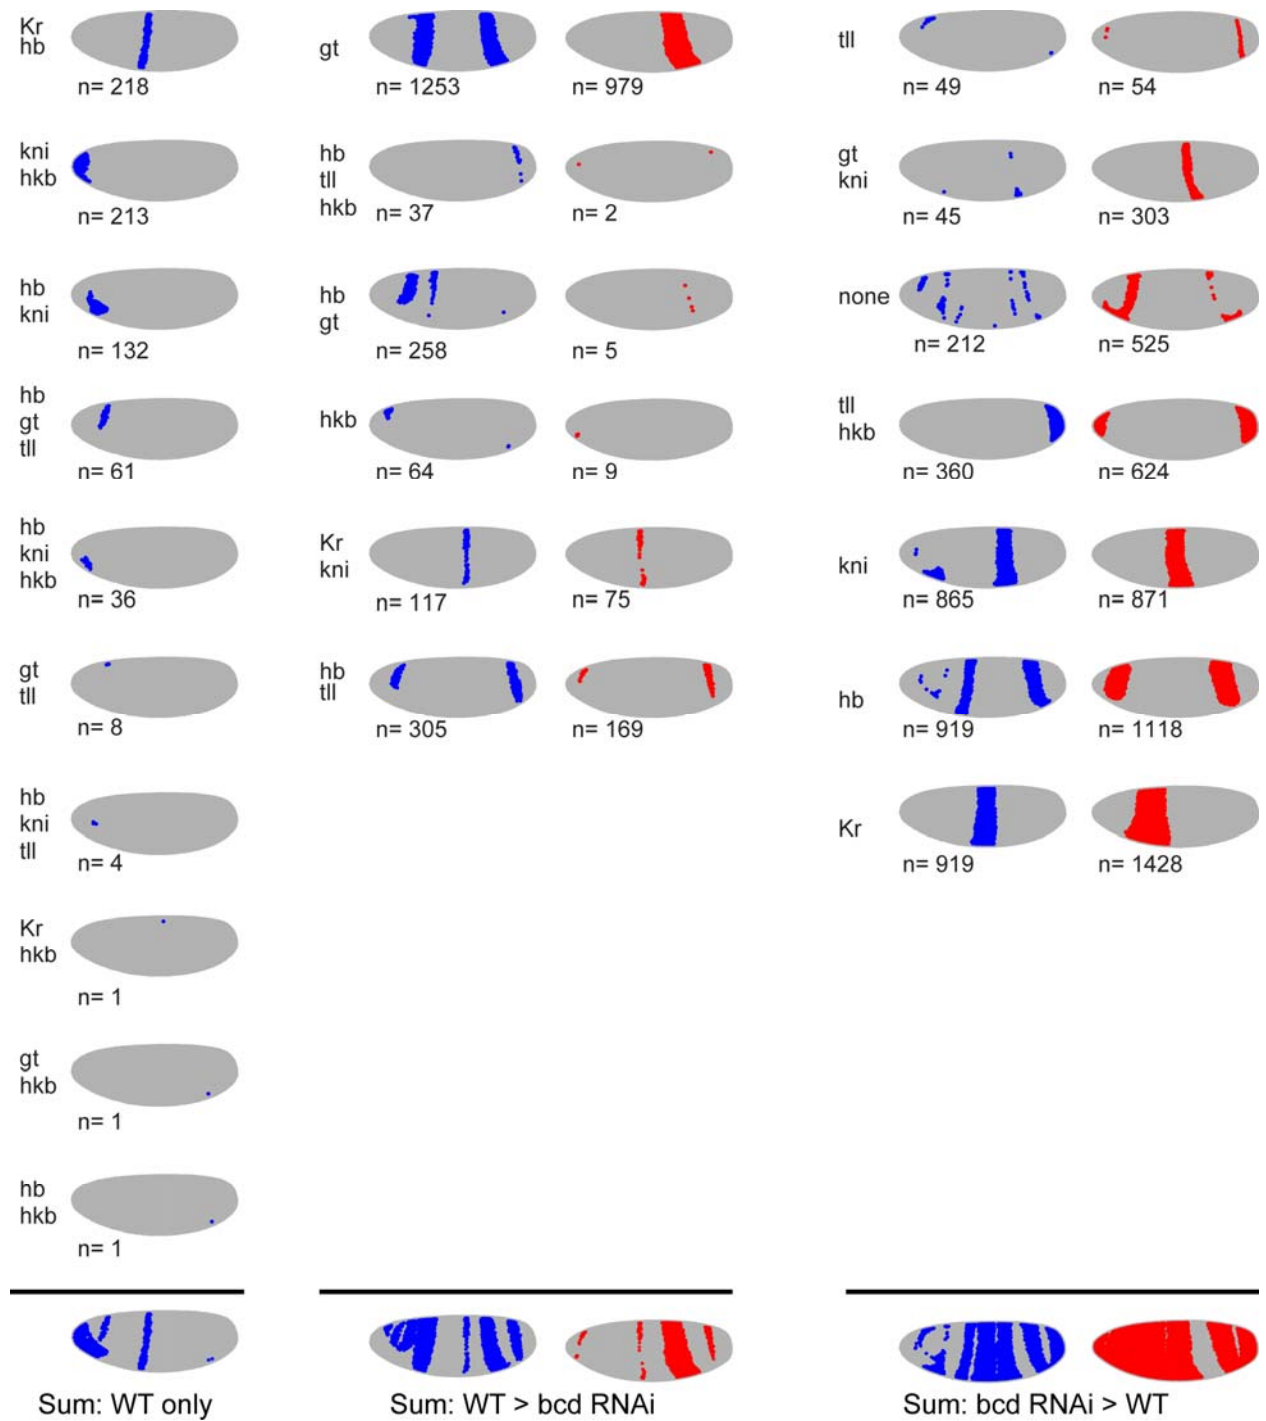

Figure S8

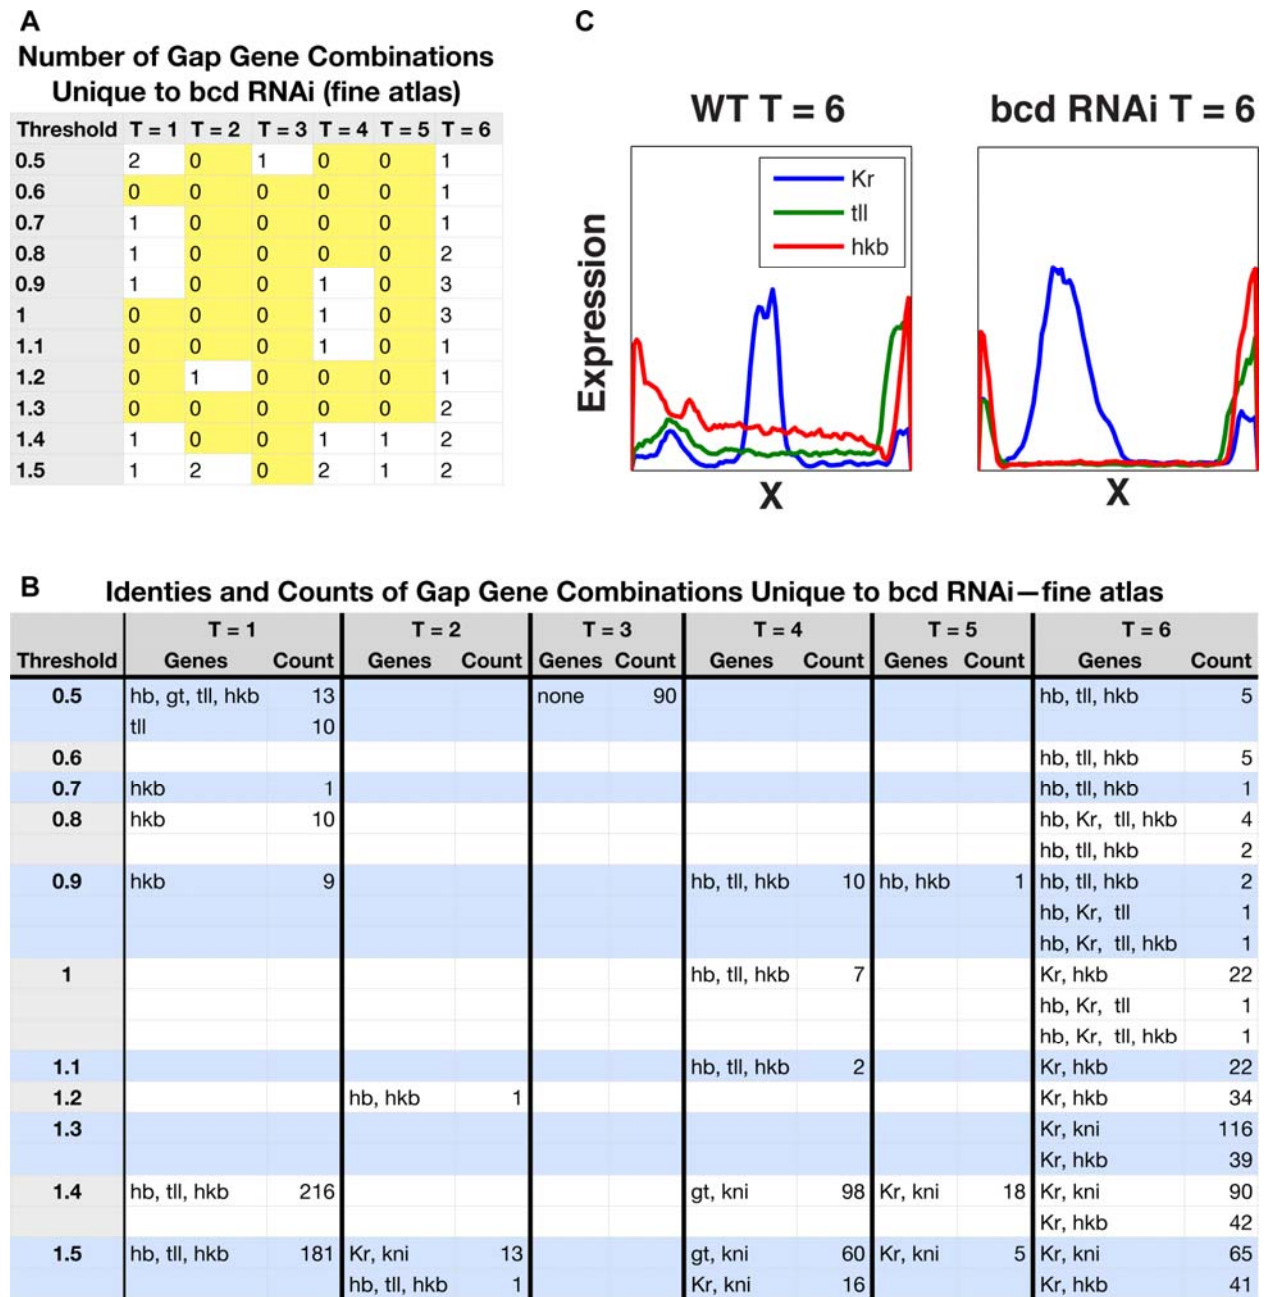

Figure S9

**Number of Gap Gene Combination Unique to bcd RNAi–hb protein**

| Threshold | T = 1 | T = 2 | T = 3 | T = 4 | T = 5 | T = 6 |
|-----------|-------|-------|-------|-------|-------|-------|
| 0.5       | 2     | 0     | 0     | 2     | 1     | 3     |
| 0.6       | 2     | 0     | 0     | 1     | 0     | 4     |
| 0.7       | 2     | 0     | 0     | 1     | 0     | 4     |
| 0.8       | 2     | 0     | 0     | 0     | 1     | 4     |
| 0.9       | 2     | 0     | 0     | 0     | 2     | 3     |
| 1         | 1     | 0     | 0     | 0     | 1     | 1     |
| 1.1       | 0     | 0     | 0     | 0     | 1     | 1     |
| 1.2       | 1     | 1     | 1     | 1     | 2     | 3     |
| 1.3       | 2     | 1     | 1     | 0     | 2     | 5     |
| 1.4       | 1     | 1     | 1     | 3     | 3     | 4     |
| 1.5       | 1     | 2     | 1     | 4     | 3     | 4     |

**Identities and Counts of Gap Gene Combinations Unique to bcd RNAi–hb protein**

| Threshold | T = 1             |       | T = 2         |       | T = 3         |               | T = 4         |       | T = 5   |         | T = 6        |       |
|-----------|-------------------|-------|---------------|-------|---------------|---------------|---------------|-------|---------|---------|--------------|-------|
|           | Combo             | Count | Combo         | Count | Combo         | Count         | Combo         | Count | Combo   | Count   | Combo        | Count |
| 0.5       | gt, tll           | 51    |               |       |               |               | Kr            | 878   | Kr      | 922     | Kr           | 932   |
|           | hbP, gt, tll, hkb | 13    |               |       |               |               | gt, tll       | 1     |         |         | tll, hkb     | 45    |
|           |                   |       |               |       |               |               |               |       |         |         | tll          | 1     |
| 0.6       | gt, tll           | 88    |               |       |               |               | gt, tll       | 1     |         |         | Kr           | 1070  |
|           | hbP, Kr, kni      | 218   |               |       |               |               |               |       |         |         | tll, hkb     | 87    |
|           |                   |       |               |       |               |               |               |       |         |         | tll          | 3     |
|           |                   |       |               |       |               |               |               |       |         |         | Kr, tll      | 1     |
| 0.7       | gt, tll           | 69    |               |       |               |               | gt, tll       | 1     |         |         | Kr           | 1196  |
|           | hbP, Kr, kni      | 122   |               |       |               |               |               |       |         |         | tll          | 8     |
|           |                   |       |               |       |               |               |               |       |         |         | Kr, hkb      | 2     |
|           |                   |       |               |       |               |               |               |       |         |         | Kr, tll      | 1     |
| 0.8       | gt, tll           | 27    |               |       |               |               |               |       | tll     | 2       | Kr           | 1310  |
|           | hbP, Kr, kni      | 59    |               |       |               |               |               |       |         |         | tll          | 14    |
|           |                   |       |               |       |               |               |               |       |         |         | Kr, hkb      | 10    |
|           |                   |       |               |       |               |               |               |       |         |         | Kr, tll      | 6     |
| 0.9       | gt, tll           | 5     |               |       |               |               |               |       | tll     | 10      | tll          | 30    |
|           | hbP, Kr, kni      | 19    |               |       |               |               |               |       | hkb     | 1       | Kr, hkb      | 18    |
|           |                   |       |               |       |               |               |               |       |         |         | Kr, tll      | 13    |
| 1         | hbP, Kr, kni      | 2     |               |       |               |               |               |       | hkb     | 2       | Kr, hkb      | 22    |
| 1.1       |                   |       |               |       |               |               |               |       | hkb     | 4       | Kr, hkb      | 22    |
| 1.2       | hbP, tll, hkb     | 216   | hbP, tll, hkb | 377   | hbP, tll, hkb | 313           | hkb           | 1     | gt, kni | 57      | Kr, hkb      | 34    |
|           |                   |       |               |       |               |               |               | hkb   | 6       | gt, kni | 29           |       |
|           |                   |       |               |       |               |               |               |       |         | hkb     | 1            |       |
| 1.3       | hbP, tll, hkb     | 211   | hbP, tll, hkb | 337   | hbP, tll, hkb | 239           |               |       | gt, kni | 33      | Kr, kni      | 116   |
|           | hkb               | 2     |               |       |               |               |               |       | hkb     | 7       | Kr, hkb      | 39    |
|           |                   |       |               |       |               |               |               |       |         |         | hkb          | 2     |
|           |                   |       |               |       |               |               |               |       |         |         | gt, kni      | 13    |
|           |                   |       |               |       |               |               |               |       |         |         | hbP, tll hkb | 1     |
| 1.4       | hbP, tll, hkb     | 197   | hbP, tll, hkb | 303   | hbP, tll, hkb | 186           | gt, kni       | 98    | gt, kni | 15      | Kr, kni      | 90    |
|           |                   |       |               |       |               |               | hbP, tll, hkb | 17    | Kr, kni | 18      | Kr, hkb      | 42    |
|           |                   |       |               |       |               |               |               | hkb   | 9       | hkb     | 7            |       |
|           |                   |       |               |       |               |               |               |       |         | gt, kni | 6            |       |
| 1.5       | hbP, tll, hkb     | 189   | hbP, tll, hkb | 269   | hbP, tll, hkb | 139           | gt, kni       | 60    | gt, kni | 4       | Kr, kni      | 65    |
|           |                   |       | Kr, kni       | 13    |               |               | Kr, kni       | 16    | Kr, kni | 5       | Kr, hkb      | 41    |
|           |                   |       |               |       |               | hbP, tll, hkb | 6             | hkb   | 15      | hkb     | 15           |       |
|           |                   |       |               |       |               | hkb           | 2             |       |         | gt, kni | 2            |       |

Figure S10

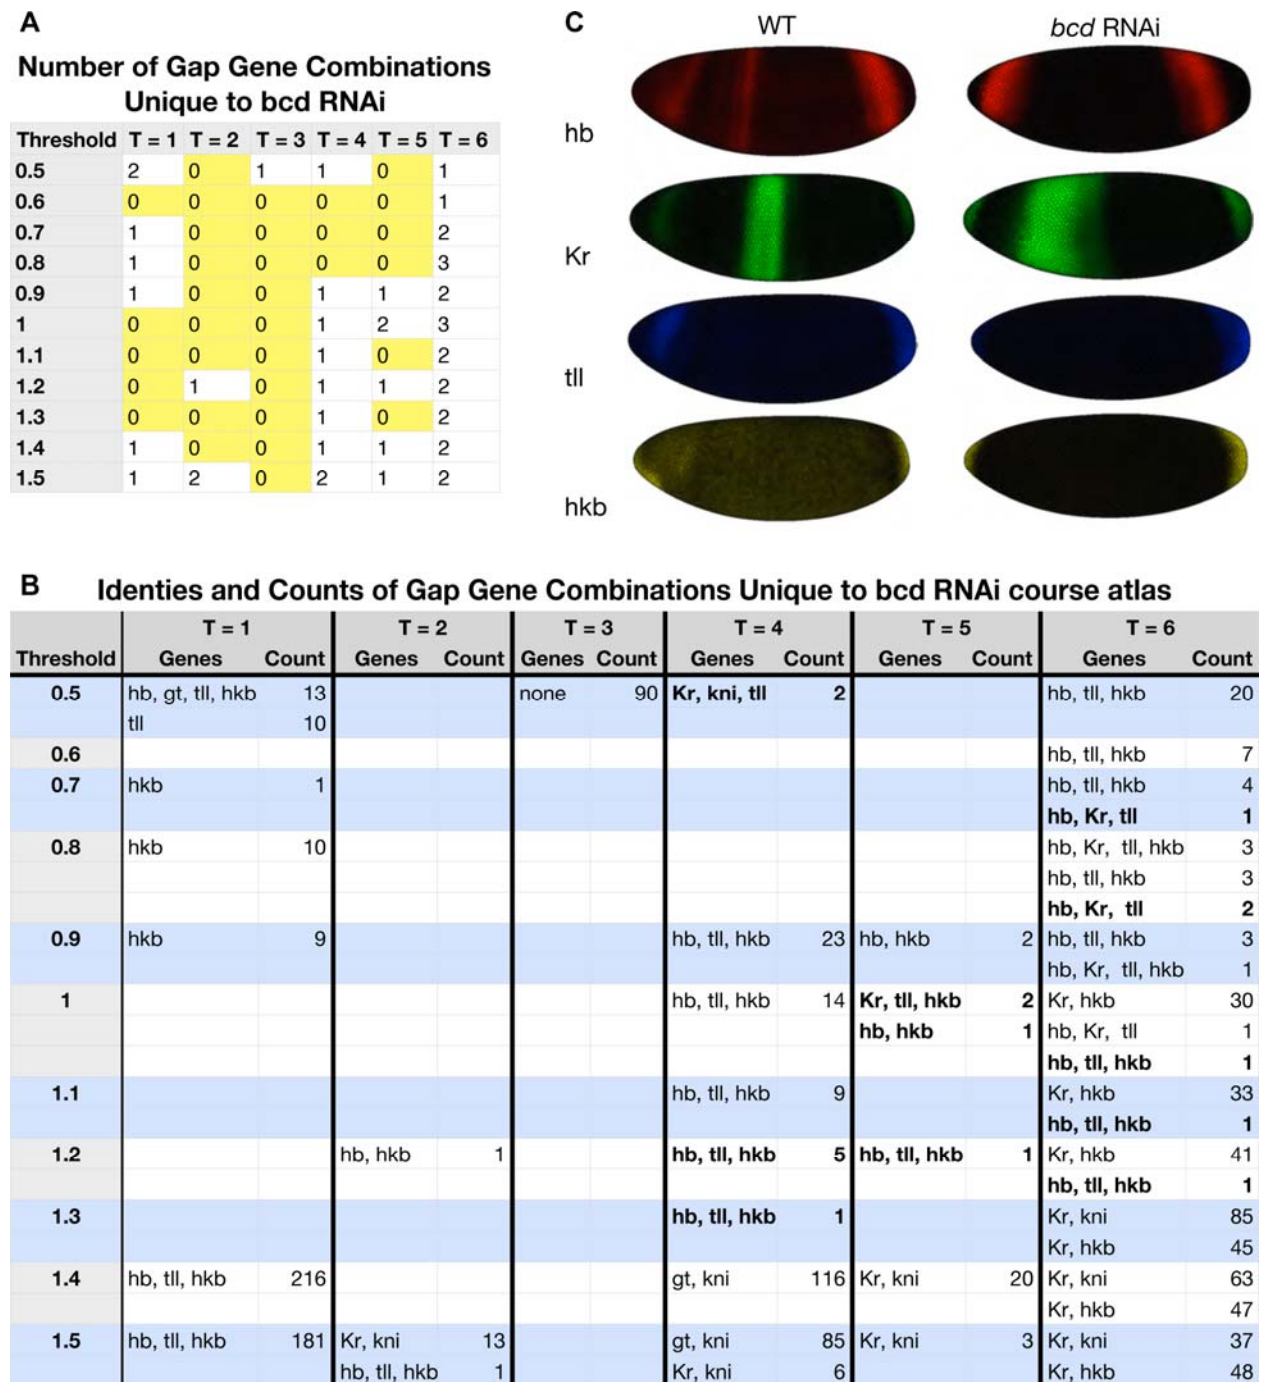

Figure S11

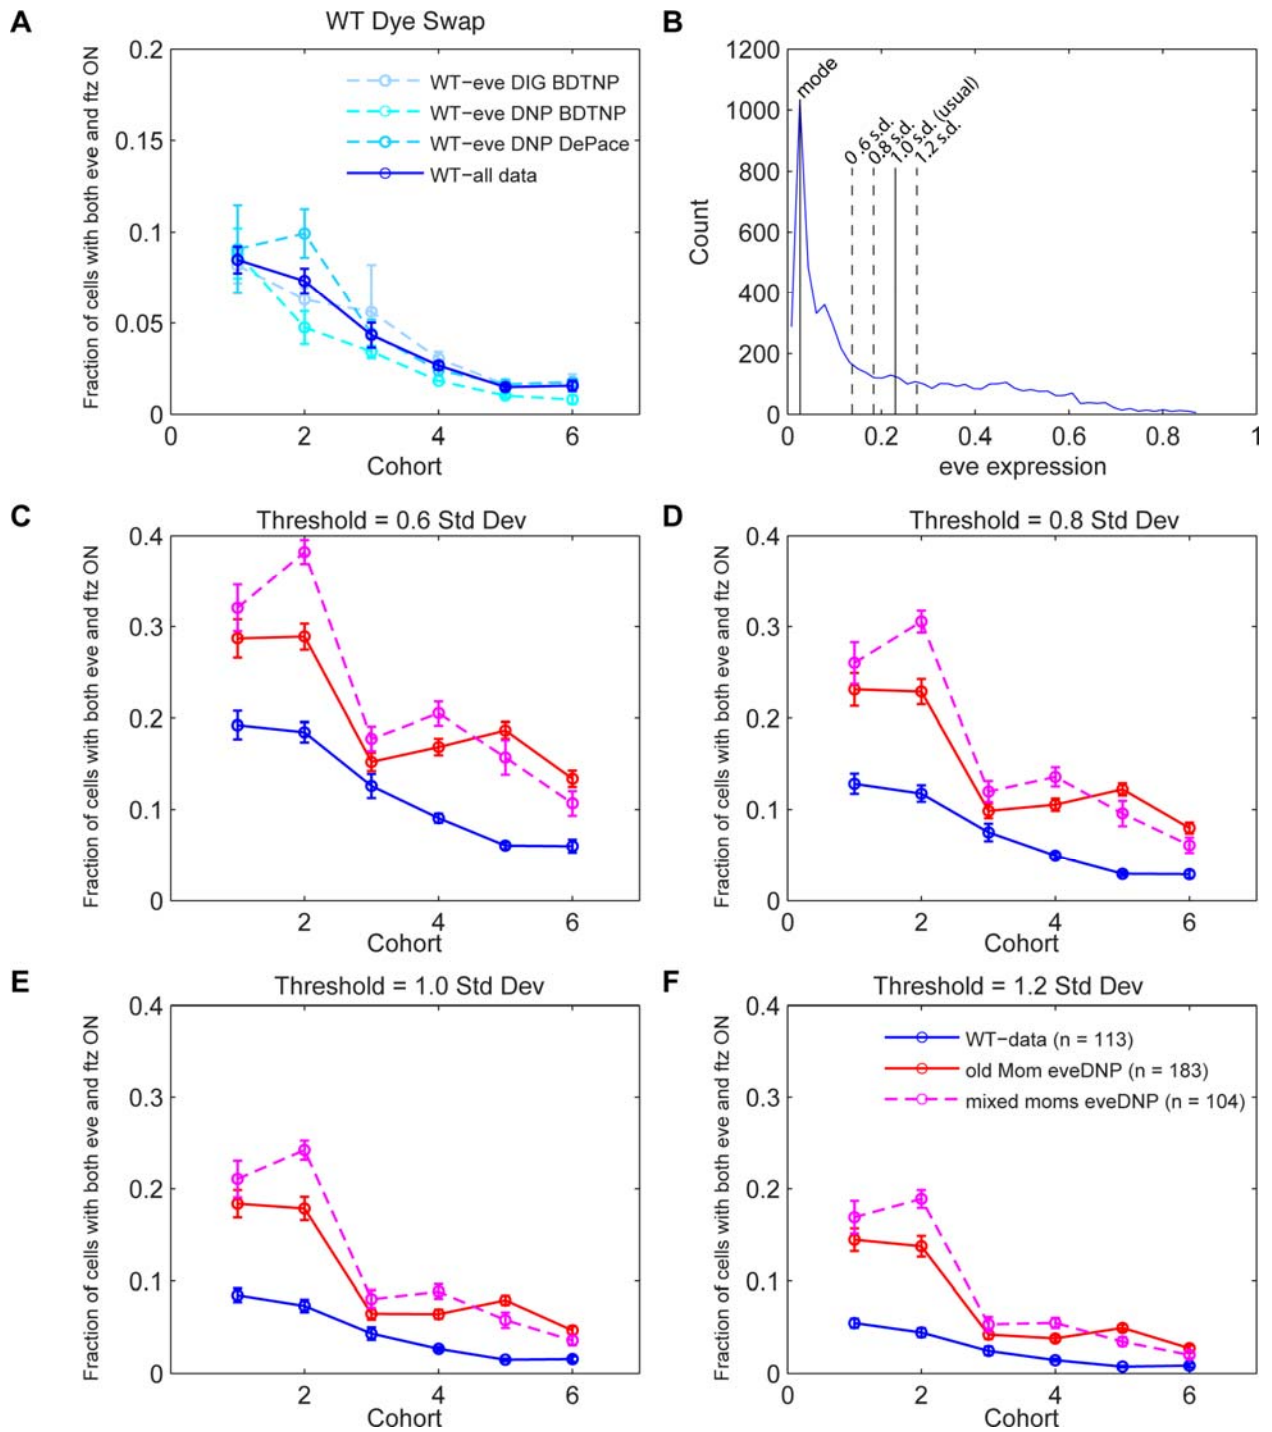

Table S1: Sequences of the enhancer *lacZ* reporter constructs included in the *bcd* RNAi atlas.

| Construct           | Enhancer sequence                                                                                                                                                                                                                                                                                                                                                                                                                                                                                                                                                                                                                                                                                                                                                                                                                                                                                                                                                                                                                                                                                                                                                                                                                                                                                                                                                                                                                                                                                                                                                                                                     | Reference               | Primer sequence                                                  |
|---------------------|-----------------------------------------------------------------------------------------------------------------------------------------------------------------------------------------------------------------------------------------------------------------------------------------------------------------------------------------------------------------------------------------------------------------------------------------------------------------------------------------------------------------------------------------------------------------------------------------------------------------------------------------------------------------------------------------------------------------------------------------------------------------------------------------------------------------------------------------------------------------------------------------------------------------------------------------------------------------------------------------------------------------------------------------------------------------------------------------------------------------------------------------------------------------------------------------------------------------------------------------------------------------------------------------------------------------------------------------------------------------------------------------------------------------------------------------------------------------------------------------------------------------------------------------------------------------------------------------------------------------------|-------------------------|------------------------------------------------------------------|
| <b>eve1</b>         | AGGCCTAATCACTTCCCTGAAATGCATAATTGTGCCGCGCTTTTGATACGCTCTGGCCGAGAGGAGATGAGGAAA<br>GGATGCACGGGAACCCGACGCCAAGTGGCAGTTCGAGATTGGCAAATCCGCCAGCGGACAAATGCCAGAGAATGGGCA<br>ACAAGTAGCGGGAATAGCAATCTATCATGCTTTTATGGCCGGCCAACTTTGCCCGCGCATCTCAGTTCATCCGAA<br>GCGGGACCAAGTCCAGGTTCAAGTCCAGGTTCCAGTACCCTGCTATCCCGTCAACCCCTTTAGGGCGATAATCTCTT<br>AAATGTTTGCATTAATTTTCGAGGCGTGGACGGATTAGGGCGTCTGGCTGGGCGGAACCCGAGCAGAAACCCGCCA<br>GGACACTGCACCGACTGACCTGCAGCTACAGATCTCTGATCTTCGATCTCTAATCTTCGCAATTTGCAACTGACTTC<br>TGCACCTGGTCCGCCCTAATCCTTCGCCGAGAAAGCCGCGAGAGTCCGAGACTTGGCCCGGGTAAATGGGATTA<br>TCTGCAATTACCCAGATGATCCGACAGAAAGTCAACTGTGTTCCAGGGCTAATTGTACGCAAGTCAACTAAATCCAAT<br>CCTTCGCGCCCTCTCTGTTTATTTGTTTGTTCGTTTGTGTTGAGAATTTCTGGCAATTAAGTTGCCGTTTTGATGC<br>GCGGGGGCGGGTGCATCAATCCTTCGCGATACCTGTCTGCACAAATGCTGAATTCGCGATCCCATGGATCCCAAG<br>ATATTAGATATCCCAAGGC                                                                                                                                                                                                                                                                                                                                                                                                                                                                                                                                                                                                                                                                                                                                                                  | Fujioka et al., 1999    | AGGCCTAATCACTTCCCTG<br>GCCTTGGGA<br>TATCTGAATA<br>TCTGG          |
| <b>eve46</b>        | AGGATCCCTGGGCTCTGGGCTCTGGACTATCCGCCGACCCTCCATATCCATGATTTACAATTCGTTTTTTCGCGTTA<br>TTTTTTTAGGGGCTTAATGACCGTCTGAAAGCCGAGGAGACCAGGACCAGGACTCTGCTCACATTTTCGCGCACTG<br>ATCTAAAAAATGAATCAATTTTTCTTGAATTTTCAAGCGCCGCTCAGCAGGACTCTTTGTTCTCGGCCAGGCAATG<br>TCCTTTTTTGGCGTCACTCTCAGTTTTTCTGCTCCAGCGGGCATTACCTACACGGCGTTTTATGGCGAGATGATATTCG<br>CCTGGGATCGGTTCCGTTTTTAGGCCATAAAAATAGCGCGCATAAAAAAGTCAATTTGGAATTCAGTTCTAGTTTCA<br>AGTTTTAGGTTTCCAGGTTTTCTGCCAGCCGCTAGATTGCAATTTCCGGAATTCGGAAGCGGAACAGAATGCCA<br>AATGGTCAGAATCCTGCTGACCTTGCCTTTTGGCCAGGGGCGCTAAAAAATTTGACTCGCTCGCGGTGCGCGAAAT<br>TTTTAAATCTGCATTTTCAACAATCTCTGATCTGGGTTTGAATCGTAAAAAAGCAGAAACAAAAGCGGGCAATTTTC<br>GTCCGCAATGATCTGTTAATGGGCGGGCTAAAAAATAAGTCAACAAGTCAACAAGTTTGCCTGTAATTTGACCCG<br>GTTAAGAAATGCTGTCTGTACCGAGAAGGATGCAGGACATTGACACTTCAAAGTCCACCCTCGAAGGATTTCC<br>CGAAGATTAC                                                                                                                                                                                                                                                                                                                                                                                                                                                                                                                                                                                                                                                                                                                                                                            | Fujioka et al., 1999    | AGGATCCCTGGGCTCTG                                                |
| <b>eve5</b>         | ATATCCCAAGGCCGCAAGTCAACAAGTCCGCGAGCAATTTCCCTTTGTCGGCGATGTGTTTTTTTTTAGCCATAACT<br>CGCTGCATTGTTGGGCCAAGTTTTTCTTGCCAAATGCGGAGATGATCCGGGATATGCGCTGATTGCGTCAAT<br>TATGGACATCCTGCGAGGCCCGAGGAACCTCTGCTCAATCTTTTCATCCGCTACAGAACCCTTTGTGTCCCGTTC<br>CGCGGAGTCTTGACGGTCTCTGACTATTGCTTACAGCAGCTTGCCTAAAAATTTATAAACCCTACGAGCGGCTCT<br>TCCGCGCAATCCCTGGCAATATCCTTTTACCTCTTGCCAACTCCGTTGGCTAAAAAAGCGCTTCGACTTCGCGTAACT<br>GCTGGACAAACAAGACAAAAACGGCGCAAGGACCGCGATTTCAGGATGACTTGCGAATTCGCTCAAACTAAAGGAC<br>CGGTTATATAACGGGTTTTATATGGCCAGAATCTCTGCATCTCCACGACCCGCAAGAGCTGCGTAAAAACTGCAAGCTCTG<br>TTTTGATTTCTGCAACTTTCAGTTAATTTGCCCGGATGGCCAGCAATTTGCCGCAATTTAAAAACAGCGCAGATGACT<br>CAGTTCCTCATCTAACTATATCTCATGCCAAAATCTAGGGTGGGGAGCGGAGGGGCGGGGTGCGTGGGTA<br>GCCTGCCAGGAAAGGGGGCGGGGTTACGCGGGTGATAAATGTGCGTATTGGAATGAATGCGCATCGATTA<br>CCGACGGGCAATCAATT                                                                                                                                                                                                                                                                                                                                                                                                                                                                                                                                                                                                                                                                                                                                                                             | Fujioka et al., 1999    | ATATCCCAA<br>GGCCGCAA<br>AG<br>AAATGATTG<br>CCCTCGGG<br>T        |
| <b>eve3+7</b>       | GGATCTCGAAATCGAGAGCGACTCGCTGCATTAGAAAAGTATGATCAGTTTTTTGTTTTGGCCGACCGATT<br>CCGGTGTCTCTTTACGGTTTATGGCCGCTTCCATTTCCAGCTTCTTTGTTCCGGCTCAGAAATCTGTATGGAAT<br>ATGGTATATGACAGATTTTATGGGTCCCGGCGATCCGGTTCGCGGAACCGGAGTGTCTGCCCGGAGAGGCTCTCGC<br>CGCCGATCCTGTGCGCCGATTTAGGAAAGTAGATACGTTTTTTGTTCCCATTTGCGCTGCGCTTTTTTCGCTGCGT<br>TTTTCCCGCAACCAGCGAATCTGCTAATTTTTTAATTTCTTACCGCTTTTCATTTGGGCTCCTGAAAAACCGGGCA<br>AGGTTATAACGCTCTACTTACCTGCAATTTGCGCCATAACTCGCACTGCTCTCGTTTTTAAAGATCCGTTTTGTTGT<br>TTTTGTCGGATGCGCAATCAGTTTTTACGAGCTC                                                                                                                                                                                                                                                                                                                                                                                                                                                                                                                                                                                                                                                                                                                                                                                                                                                                                                                                                                                                                                                                                          | Small et al., 1996      | GGATCTC<br>GAAATCGA<br>GAGC<br>GAGCTCGT<br>AAAAACGTG<br>AATGC    |
| <b>eve2</b>         | GGTACCCTGACTGCATAACAATGGAACCCGAAACCGTAACCTGGGACAGATCGAAAAGCTGGCCTGGTTCTCGCTG<br>GTGTGCGGTGTTAATCCGTTTTGCCATCAGCGAGATATTAGTCAATTTGCAGTTGCGAGGTTTTTCGCTTCCGTTT<br>ACTTTCGAGTTAGACTTTATGACAGCATCTGAAACAATCTGCGAGTTTGGTAACAGCTGTGCCATACTTCAATTTAGA<br>CGGAATCGAGGACCCCTGGACTATAATCGCAACAAGAGACCGGGTTGCGAAGTCAAGGCAATTCGCGGATCTAGCCA<br>TCGCCATCTCTCGGGCGTTTTGTTGTTGTTGCTGGGATTAGCCAAAGGGCTTGAATTTGGAATCCAATCCGATCCC<br>TAGCCGATCCCAATCCCAATCCCAATCCCTTGTCTTTTCAATAGAAAAGTCAAAAAACATAAATGATGTGCAAGG<br>GATTAGGGG                                                                                                                                                                                                                                                                                                                                                                                                                                                                                                                                                                                                                                                                                                                                                                                                                                                                                                                                                                                                                                                                                                           | Small et al., 1991      | GGTTACCC<br>GGTACTGCA<br>TAAC<br>CCCTAATC<br>CCTTCGACA<br>TC     |
| <b>eve46mini</b>    | TCGAGCAGGACTTTTGTCTCGGCCAGGCAATTGCTTTTTTGCCTCAGCTCTCAGTTTTTTCGTCAGCGGGCAT<br>TACCTACACGCGCTTTTATGGCGGAGATGATTTGCTGCGGATCGGTTCCGTTTTTATGGCCATAAAAAATAGGCGGCA<br>TAAAAAAATGCAATGGAAATCTAGTTCTAGTTTTCAAGTTTTTAGGTTTTCCAGTTTTTCCAGGTTTTGCAATGTTT<br>TTTCGCGGAATTCGGAAGCGGAACAGAATGCCAGAAATGGTCAAGATCCTGGCTGACTTGCCTTTTGGCCAGGGGCC<br>GTAAAAAAATGACTCGCTCGGTTGCGCGGAATTTTTTAATCTGACTTTCCAACAATCTCTGATCTGGGTT                                                                                                                                                                                                                                                                                                                                                                                                                                                                                                                                                                                                                                                                                                                                                                                                                                                                                                                                                                                                                                                                                                                                                                                                               | Fujioka et al., 1999    | TCGAGCAG<br>GACTCTTTG<br>TTCTC<br>AACCCAGAT<br>CAGAGATTG<br>TTGG |
| <b>hb posterior</b> | TAGCACGAAAAACCGAAGGATTAAGAAAGGAAACTAGAGCAGAGGTCGCGGGCAGGGCGAATAGTTGCTCAATTTTCA<br>TGTCCGCTTAATGGTTACGCCGTAATAATGGCTATGCGGCCAAACAATGTCGGAAGGACGACGGCAGGACGCGCAGGA<br>CAATCGCTGGTGGATTCCAGTGCACACGCCACAGAGATTTATGAAGGCAACTCGCTTTGCATGTTATTCATAGATTT<br>CTTCCGTTCCCGGTTTTGTTGTTGTCAGGTAAGACCTTCGATTAACAATGAAAGTGTGAAAAATCGCGAGAAACTTCGAAA<br>GACACACAAAGATACAATATCTAGTCTAATGGTCAATAGAGCGGTGCGCTCTACATCAATTTGACCAGCCGCTTTGTT<br>GAAGCCTAAAAACGTCGCAAAAAACACTTCCGCGTAAGACATCCATTTCTGTGGTCCGATCGTAAATATTAGTTTT<br>TATGACCAACGGTTCGCGGCGAGTGTGCTGCGGTTTTTGTGCGCACTCAACCCCTTCAACCCATTAAGAAAAAATC<br>GCATCCTGTGAGTGTCTTCCCGTTTTCCCTCGAAACCGCCACAATTTGTGCTTTGCGTTTTCTCTCTTTTTTTGTT<br>CCACCTAATGTCCGCGCTTATGTTCTTTATGACGCTCGGTTGTTCTTTTTTATGGTGTCTTTTGTCTTTGAGCCTCGT<br>TGACGGCCAAATCCCTACTTCCCTCAACCTTTGGCGGACGAGAAAGTTGCTAGGAGGAGAACCGGGTTAAGCGAAAACT<br>CAITGCACTTTTACAAGCCGCGATCTTCTGGAATTAGTTTTGTTGCTTAGGCGAAAGGTTAATTTGCAATTTGGCTCTCG<br>GTGGGTTACTGAGTGAATCAATGGGCTAAGGCGAGTAAAGGTTACTGTTTTACATTTTACTACTTTGAAAAATACTGAA<br>GAACTGTAGGAAAAATTTCCAGCACTTTTAAAGCCATATATACTTATGAATGAACTTCAAAATGTAATACTGAAAAGT<br>ACATGTAGTTATTTAAGGTCCTTGAATGATCATCGCTCAAAAATTTCTTTTTTAAATAATTTTTAAATAATTTTTTATGATGAT<br>ACGAAGTATTTAAAGTGTGAACAGATTAACACATTAATTTATAAAAGTAAATACACAGATTTAGCATAGAAATAAAAACT<br>TTAATGTTCCCTCATAAGTAACGGTCTGTGAAATTTCTGAAAAATCCCAAAATTTATTTGATCCCTTTGGCCGAACTTTG<br>GTGCGATTACTCGTAATCTGCTGGAATTAAGGCCACTAAGTCCGCAAGCAATGAATTCGGACATTTGGCATTGGACAA<br>ATGTAATAAGGACTCTAGAGCCCGACATTGCAATGGTCCATTGTTGAGCGTCCGAAAGATCTGAAACCAAACCCAAAC<br>CAAATCCGAGCTTAGGCAATCGGCATTGGGAAATAAGGCCAAATATTTACCCCACTCCAAAAACGAGCATT | Wunderlich et al., 2012 |                                                                  |

Staller et al.

Canalization in *bicoid* RNAi embryos

| Construct                       | Enhancer sequence                                                                                                                                                                                                                                                                                                                                                                                                                                                                                                                                                                                                                                                                                                                                                                                                                                                                                                                                                                                                                                                                                                                                                                                                       | Reference               | Primer sequence         |
|---------------------------------|-------------------------------------------------------------------------------------------------------------------------------------------------------------------------------------------------------------------------------------------------------------------------------------------------------------------------------------------------------------------------------------------------------------------------------------------------------------------------------------------------------------------------------------------------------------------------------------------------------------------------------------------------------------------------------------------------------------------------------------------------------------------------------------------------------------------------------------------------------------------------------------------------------------------------------------------------------------------------------------------------------------------------------------------------------------------------------------------------------------------------------------------------------------------------------------------------------------------------|-------------------------|-------------------------|
| <b>gt posterior</b>             | AATTTATTACCAGAACTTACCATCACTTCGAGATGAAAGTGCGGAGGAGAGCGCTGATCTTTGCTTATCCCAAACCTAGG<br>GGTTTTTTAGGGGTAAAAAGCGGGAATACAGATTCTCAGAAACAAAATGGCAGTCCCTAATATGTGATAAGTTGCTTTCAA<br>CTTACGTTTACGACAGGGGCCATTGGAAGCTAAGGATTCCAATATGCGACTGTTAACCCATTAAAGACAAAGGGCCGCGA<br>AAGGAGTTAACGGCAATTCGCCGAAACCAAGCAGCAATCCAAATCCAAACCACTCCTCACCCCTTTTTGGACGGGTGG<br>GACGGGTCATATAAGGCAAAACCCCTTTTCAGTCAATTAGTCGCTGATTTTTCTTTGTCACCTAGCAGCGGACCAATATAA<br>AATCGCAGCCACAATGGTTCGGAGGAGAGAACCCCTTTTTTTTTAAGGACCGCCGGTGTCCGAAATATCAGTTTATGGCT<br>CCTTAAAAAAGTGCAGCGGTTTTAGGGCCCGCGGACTCGGAATGAGGCCCTTTTCGCACGAAAGCGTCCATTATGCAATA<br>AAACTTTGGATGTTTTTTAGGCAACAGCATAACAGCCTAATACAGCGCATACCGTGGGTGGGCAACCCGTTTCGGCCATC<br>AGGTAGATGATCCGTAATAAACCGCCCAAGGTCACAACCTCAAAGGATTGCACAAATATTGCATCTTTGGTTCGGAGC<br>TCATTATGGCGAAGGAACAGCAGTCCGAGTATATGAATATATGGTTTTATGGCCTGCTGTTTTTACGTTTTTTTTTCGCT<br>GAATCTGGTTTTTACACCGAAGTGGCAACTCTTTGGCTTCGACTTCGGCCGCGACTTTTTATGGCATCTGCTCGGGAT<br>CGATTGGGCTGGGCTATACGTATGTCAGGATCTGGAAGGGCTCGGGTTCGGGCCCGGTAACCGCAGGTAAGGGATC<br>GACTCAATGACGGCGACGTGACGGTCCGAGTTTTAGTTTAAATCCACCATTTTTACGGTTGGATTAGCGCACGGATTAGC<br>GGATAAGTTCGCGGTTTTTACTGATTACCATCGATCGATCCCTCTTTTTATTGCAATTACCCAATCCCCTGAATGGG<br>CAGTTGTAAA | Wunderlich et al., 2013 |                         |
| <b>eve late seven stripe</b>    | -6.4kb (NdeI) to -4.8kb                                                                                                                                                                                                                                                                                                                                                                                                                                                                                                                                                                                                                                                                                                                                                                                                                                                                                                                                                                                                                                                                                                                                                                                                 | Fujioka et al., 1996    | -6.4kb (NdeI) to -4.8kb |
| <b>eve whole locus reporter</b> | Begins -6.4 kb upstream of <i>eve</i> transcription start site (TSS) and ends 11.3 kb downstream of <i>eve</i> TSS. The <i>eve</i> coding sequence has been replaced with <i>LacZ</i> and the neighboring <i>TER94</i> gene has been fused to GFP                                                                                                                                                                                                                                                                                                                                                                                                                                                                                                                                                                                                                                                                                                                                                                                                                                                                                                                                                                       | Gift from M. Fujioka    |                         |



Staller et al.

Canalization in *bicoid* RNAi embryosTable S2: The numbers of individual embryos for each gene at each time point included in the *bcd* RNAi gene expression atlas

| Genes                        | T=1  | T=2  | T=3  | T=4  | T=5 | T=6 |
|------------------------------|------|------|------|------|-----|-----|
| <b>D</b>                     | 9    | 19   | 26   | 13   | 5   | 13  |
| <b>Kr</b>                    | 10   | 13   | 16   | 10   | 8   | 10  |
| <b>hb posterior enhancer</b> | 6    | 8    | 20   | 9    | 6   | 3   |
| <b>gt posterior enhancer</b> | 21   | 18   | 29   | 13   | 6   | 3   |
| <b>eve3+7 enhancer</b>       | 3    | 10   | 13   | 7    | 5   | 10  |
| <b>eve4+6 enhancer</b>       | 10   | 27   | 26   | 16   | 8   | 8   |
| <b>eve5 enhancer</b>         | 6    | 16   | 32   | 12   | 6   | 9   |
| <b>eve4+6mini enhancer</b>   | 3    | 8    | 12   | 11   | 0   | 3   |
| <b>eveLocus lacZ</b>         | 6    | 20   | 13   | 13   | 4   | 2   |
| <b>cad</b>                   | 5    | 15   | 24   | 14   | 3   | 6   |
| <b>eve</b>                   | 17   | 22   | 54   | 34   | 32  | 23  |
| <b>fkh</b>                   | 5    | 14   | 16   | 9    | 4   | 7   |
| <b>ftz</b>                   | 38   | 77   | 94   | 30   | 19  | 32  |
| <b>gt</b>                    | 25   | 30   | 31   | 13   | 8   | 9   |
| <b>h</b>                     | 8    | 11   | 11   | 9    | 14  | 15  |
| <b>hb posterior enhancer</b> | 16   | 12   | 13   | 17   | 10  | 12  |
| <b>hkb</b>                   | 16   | 11   | 20   | 14   | 6   | 8   |
| <b>kni</b>                   | 9    | 15   | 14   | 8    | 6   | 8   |
| <b>run</b>                   | 8    | 20   | 22   | 16   | 9   | 5   |
| <b>tll</b>                   | 15   | 20   | 20   | 11   | 6   | 6   |
| <b>Hb protein</b>            | 7    | 10   | 14   | 7    | 6   | 9   |
|                              |      |      |      |      |     |     |
|                              |      |      |      |      |     |     |
| <b>Average</b>               | 11.6 | 18.9 | 24.8 | 13.6 | 8.1 | 9.6 |
| <b>Sum</b>                   | 243  | 396  | 520  | 286  | 171 | 201 |
| <b>Total</b>                 | 1817 |      |      |      |     |     |

Table S3: The standard deviations of each gene in the *bcd* RNAi gene expression atlas. Data from the WT atlas is included for comparison (Fowlkes et al., 2008).

| Gene Name             | WT s.d. | <i>bcd</i> RNAi s.d. |
|-----------------------|---------|----------------------|
| cad                   | 0.165   | 0.067                |
| eve                   | 0.129   | 0.143                |
| fkh                   | 0.068   | 0.029                |
| ftz                   | 0.131   | 0.175                |
| gt                    | 0.108   | 0.073                |
| hb                    | 0.134   | 0.059                |
| hkb                   | 0.106   | 0.037                |
| kni                   | 0.099   | 0.061                |
| Kr                    | 0.066   | 0.079                |
| tll                   | 0.063   | 0.036                |
| D                     | 0.108   | 0.103                |
| h                     | 0.167   | 0.163                |
| run                   |         | 0.154                |
| hbProtein             | 0.132   | 0.108                |
| hb posterior enhancer |         | 0.063                |
| gt posterior enhancer |         | 0.078                |
| eve3+7 enhancer       |         | 0.075                |
| eve4+6 enhancer       |         | 0.089                |
| eve5 enhancer         |         | 0.131                |
| eve4+6mini enhancer   |         | 0.077                |
| eve locus reporter    |         | 0.104                |

Table S4: ON/OFF thresholds used in the combination analysis in Figs 5, S8, S9.

| <b>WT</b>         |              |              |              |              |              |              |
|-------------------|--------------|--------------|--------------|--------------|--------------|--------------|
|                   | <b>T = 1</b> | <b>T = 2</b> | <b>T = 3</b> | <b>T = 4</b> | <b>T = 5</b> | <b>T = 6</b> |
| <b>gt</b>         | 0.35         | 0.36         | 0.34         | 0.27         | 0.24         | 0.21         |
| <b>Kr</b>         | 0.34         | 0.32         | 0.28         | 0.23         | 0.21         | 0.20         |
| <b>kni</b>        | 0.32         | 0.30         | 0.31         | 0.34         | 0.35         | 0.32         |
| <b>tll</b>        | 0.29         | 0.24         | 0.19         | 0.18         | 0.17         | 0.16         |
| <b>hkb</b>        | 0.24         | 0.30         | 0.29         | 0.27         | 0.23         | 0.21         |
| <b>hb mRNA</b>    | 0.41         | 0.28         | 0.23         | 0.23         | 0.28         | 0.25         |
| <b>hb Protein</b> | 0.21         | 0.20         | 0.22         | 0.22         | 0.22         | 0.16         |
|                   |              |              |              |              |              |              |
| <b>bcd RNAi</b>   |              |              |              |              |              |              |
| <b>gt</b>         | 0.27         | 0.30         | 0.31         | 0.26         | 0.22         | 0.17         |
| <b>Kr</b>         | 0.24         | 0.31         | 0.31         | 0.32         | 0.26         | 0.24         |
| <b>kni</b>        | 0.20         | 0.23         | 0.27         | 0.29         | 0.25         | 0.20         |
| <b>tll</b>        | 0.26         | 0.28         | 0.24         | 0.19         | 0.15         | 0.10         |
| <b>hkb</b>        | 0.15         | 0.21         | 0.24         | 0.26         | 0.19         | 0.18         |
| <b>hb mRNA</b>    | 0.21         | 0.26         | 0.28         | 0.25         | 0.22         | 0.23         |
| <b>hb Protein</b> | 0.08         | 0.13         | 0.14         | 0.24         | 0.27         | 0.35         |
